# Supplementary material for: Recent Advances in Studying the Regulation of Fruit Ripening in Tomato Using Genetic Engineering Approaches
Source: MDPI journal article supplement (doi:10.3390/ijms25020760), 2024-01-07
Supplement: s1 [file s1]

## Supplementary Figures

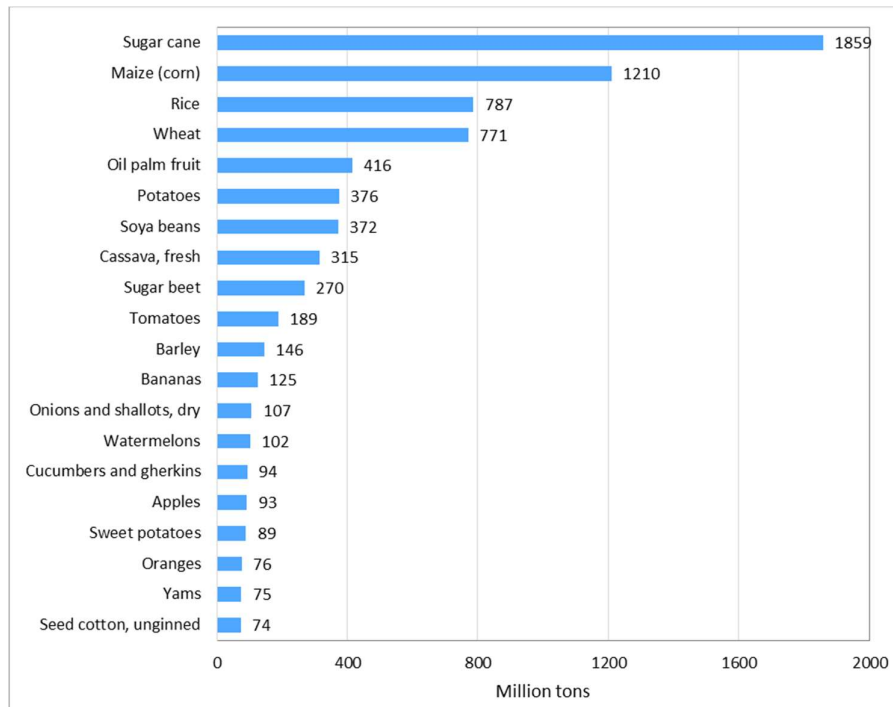

**Figure S1.** Worldwide crop production: Top 20 in 2021. Source: FAOSTAT (<https://www.fao.org>).

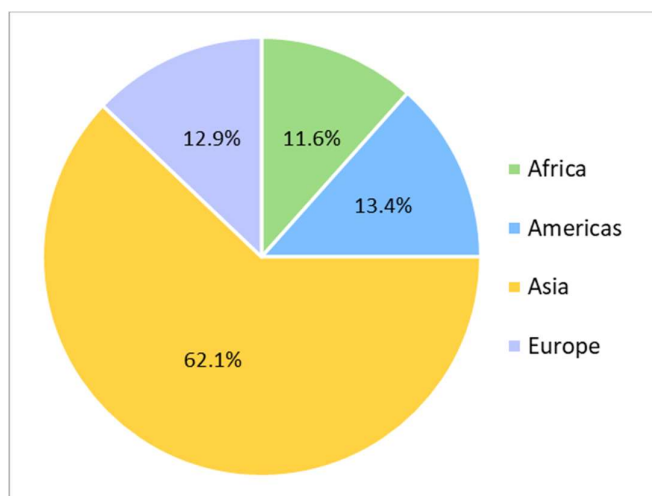

**Figure S2.** Production share of tomatoes by region. Average values from 2017 to 2021 are shown. Source: FAOSTAT (<https://www.fao.org>).

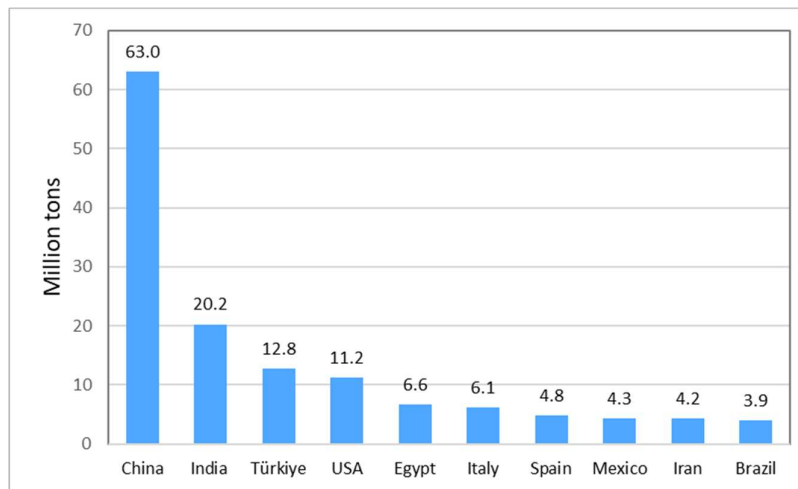

**Figure S3.** World crop production by country (top 20 leaders are shown). Source: FAOSTAT (<https://www.fao.org>).

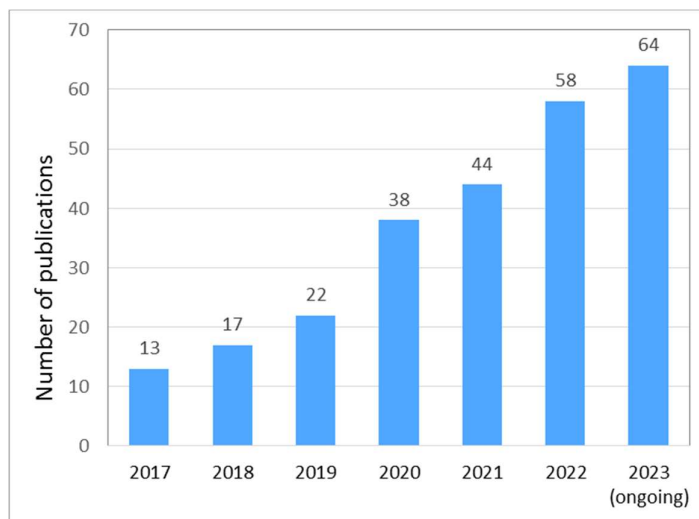

**Figure S4.** CRISPR/Cas9-related studies on tomato by year.
